# Supplementary material
Source: publisher figshare collection journal article supplement (https://frontiersin.figshare.com/ndownloader/files/14617106)
Supplement: Supplementary file 1 [file 14617106]

## Sheet: Detail Table
Acct#	Museum/Ref #	Citation/Source	Specimen Source	Specimen Type	Verification	GenBank #	GenBank Sequence Type	Prelim CR Hap	Region Label	Region	Country	Location	Lat-dd	Long-dd	Coord Qual	Collected baleen plates	Body length (m)	Sex	Ovaries‡ or testes§	Age	Physical maturity	Date of Account	Locale Recognition Year	Comment
JAPA-01	NSMT-M32505 M-138	Wada et al 2003; Oishi et al 2004; Sasaki et al 2006. NMNS Database: http://www.kahaku.go.jp/research/db/zoology/marmam/drift/index.php?k=ツノシマクジラ&x=0&y=0	Stranding	Tissue; whole skeleton	Genetic	AB116095; AB201256	mtDNA complete control region 938bp; mtDNA genome	A	A	Japan/East&South China Sea	Japan	Sea of Japan, Tsunoshima Island	34.35	130.833	1	All (L&R)	11.03	F	No	Unk	Adult	1998-09-11	2003	Holotype specimen. Shipstrike mortality with fishing boat.
JAPA-02	NSMT-M32992 M-361	Sasaki et al 2006. NMNS Database: http://www.kahaku.go.jp/research/db/zoology/marmam/drift/index.php?k=ツノシマクジラ&x=0&y=0	Stranding	Tissue	Genetic	AB201257	mtDNA genome	A	A	Japan/East&South China Sea	Japan	Inland Sea, Awashima Island, Kagawa Prefecture	34.2667	133.617	1	?	7.1	F	?	?	?	2002-06-04	2006	Stranding.
JAPA-03	NSMT-M34053 M-816	Yamada 2009. Natural Museum of Nature and Science (Tokyo) Database: http://www.kahaku.go.jp/research/db/zoology/marmam/drift/index.php?k=ツノシマクジラ&x=0&y=0	Stranding	Tissue	Genetic	?	?	?	A	Japan/East&South China Sea	Japan	Miyazaki City, Miyazaki Prefecture	31.9167	131.467	1	No	3.2	F	No	Unk	Neonate	2005-08-30	2009	Stranding. Buried and Examined two days later
JAPA-04	M-526f	Goto 2012; Ishikawa et al 2013. Natural Museum of Nature and Science (Tokyo) Database: http://www.kahaku.go.jp/research/db/zoology/marmam/drift/index.php?k=ツノシマクジラ&x=0&y=0	Incidental Catch (Setnet)	Tissue	Genetic	?	?	?	A	Japan/East&South China Sea	Japan	Sagami Bay (Pacific) , Shizuoka Prefecture	35.0667	139.083	1	No	9.2	M	No	Unk	?	2003-10-16	2017	Reported by TKY. Bycaught in set net.
JAPA-05	M-651	Goto 2012; Ishikawa et al 2013. Natural Museum of Nature and Science (Tokyo) Database: http://www.kahaku.go.jp/research/db/zoology/marmam/drift/index.php?k=ツノシマクジラ&x=0&y=0	Incidental Catch (Setnet)	Tissue	Genetic	?	?	?	A	Japan/East&South China Sea	Japan	Tokyo Bay, Pacific Ocean, Chiba Prefecture	35.15	139.817	1	No	10.05	F	No	Unk	?	2004-05-29	2017	Reported by TKY. Bycaught in large set net, found alive.
JAPA-06	M-1843f	Ishikawa et al 2013. Natural Museum of Nature and Science (Tokyo) Database: http://www.kahaku.go.jp/research/db/zoology/marmam/drift/index.php?k=ツノシマクジラ&x=0&y=0	Incidental Catch (Setnet)	Tissue	Genetic	?	?	?	A	Japan/East&South China Sea	Japan	near Ise Bay, Mie Prefecture	34.2333	136.85	1	No	6.3	F	No	Unk	Juvenile	2012-03-14	2017	Reported by TKY. Bycaught in large set net.
JAPA-07	?	Miyakawa 2018	Stranding	Skeleton	Skull Morphology	n/a	n/a	na	A	Japan/East&South China Sea	Japan	Namegawa Island, Katsuura, Chiba Prefecture	35.116	140.223	3	?	8 to 9	M?	n/a	n/a	Adult	2017-07-15	2018	Confirmed by TKY. Ref in Japanese, abstract translation: A record of Omura's whale stranding on Katsuura coast, in July 2017 Naoko Miyakawa (Chiba Prefectural Central Museum) On June 15, 2017, a whale with a length of about 8 - 9 m (presumed) was found stranded on the coast of Katsuura city, Chiba Prefecture. Since it had been almost completely skeletonized and almost no soft tissue remained, inf…
KORE-01	CRI002081	Kim et al 2018	Incidental catch	Tissue	Genetic	MG877682	mtDNA partial control region 508bp	A	A	Japan/East&South China Sea	Korea	Geoje	34.97	128.84	2	?	6.3	F	?	?	?	2004-01-10	2018
KORE-02	CRI002128	Kim et al 2018	Incidental catch	Tissue	Genetic	MG877683	mtDNA partial control region 508bp	A	A	Japan/East&South China Sea	Korea	Goheung	34.54	127.12	2	?	6.4	M	?	?	?	2006-12-17	2018
CHIN-01	NJNU0379	Yang et al 2002; Rosel & Wilcox 2014; Xu et al 2017	Stranding	Tissue	Genetic	AF398372	mtDNA complete control region 933bp; Cyt b	A	A	Japan/East&South China Sea	China	Rui'an City, Zhejiang Province	27.529	120.933	2	?	5.95	?	?	?	?	Nov or Dec 1994	2014	Labeled B.edeni on GenBank; identified as B.omurai by Rosel & Wilcox 2014
CHIN-02	?	Wang et al 2006; Xu et al 2017	Stranding	Whole skeleton	Skull Morphology	n/a	n/a	n/a	A	Japan/East&South China Sea	China	Yuhuan County, Zhanjiang Province	28.0239	121.25	2	?	5.7	F	?	?	?	2001-12-16	2006	Reported in review by Xu et al 2017
CHIN-03	?	Ma et al 2007; Xu et al 2017	Stranding?	Tissue	Genetic	EF103940?	Cyt b	n/a	A	Japan/East&South China Sea	China	Nao Zhou Island, Zhanjiang City, Guangdong Province	20.866	110.661	2	?	?	?	?	?	?	February of 2005	2007	Paper in Chinese, specimen (vertebra) collected by Zhou Kaiya (per.comm. to RLB); Reported in review by Xu et al 2017
CHIN-04	?	Wang 2012; Xu et al 2017	Stranding	Skeleton and baleen	Skull Morphology	n/a	n/a	n/a	A	Japan/East&South China Sea	China	Dongshan County, Fujian Province	23.6539	117.487	2	Yes	6.85	M	?	?	?	1991-12-12	2012	Reported in review by Xu et al 2017
CHIN-05	?	Wang 2012; Xu et al 2017	Stranding	Skeleton	Skull Morphology	n/a	n/a	n/a	A	Japan/East&South China Sea	China	Nanri Island, Fujian Province	25.1828	119.49	2	?	6	?	?	?	?	2008-08-29	2012	Reported in review by Xu et al 2017
CHIN-06	?	Wang 2012; Xu et al 2017	Stranding	?	Skull Morphology	n/a	n/a	n/a	A	Japan/East&South China Sea	China	Zhangpu County, Fujian Province	24.005	117.859	2	?	3.9	?	?	?	?	Nov of 2009	2012	Reported in review by Xu et al 2017
CHIN-07	?	Xu et al 2017	Stranding	Skeleton and baleen	Genetic	KP230447, KP230448	Cyt b, cox1	n/a	A	Japan/East&South China Sea	China	Pingtan Island, Fujian Province	25.5847	119.885	1	All (L&R)	7.15	M	n/a	?	?	2011-11-27	2017	Reported by Xu et al 2017
TAIW-01	NMNS 1004	Yamada, Chou et al 2006a	Stranding	Incomplete skeleton	Skull Morphology	n/a	n/a	n/a	A	Japan/East&South China Sea	Taiwan	Pingtung County	21.9533	120.687	2	?	?	?	?	?	?	1990-11-05	2006	Map position from review by Xu et al 2017
TAIW-02	NMNS 1931 (TN9707)	Yamada, Chou et al 2006a	Stranding	Whole skeleton and baleen plates	Skull Morphology	n/a	n/a	n/a	A	Japan/East&South China Sea	Taiwan	Tainan County	22.9481	120.069	2	Yes	5.54	M	?	?	?	1997-02-11	2006	Map position from review by Xu et al 2017
TAIW-03	NMNS 2463 (ML9702)	Yamada, Chou et al 2006a	Stranding	Whole skeleton and baleen plates	Skull Morphology	n/a	n/a	n/a	A	Japan/East&South China Sea	Taiwan	Miaoli County	24.6225	120.703	2	Yes	5.13	M	?	?	?	1997-03-05	2006	Map position from review by Xu et al 2017
TAIW-04	TP9702	Yamada, Chou et al 2006a	Stranding	Incomplete skeleton	Skull Morphology	n/a	n/a	n/a	A	Japan/East&South China Sea	Taiwan	Taipei County	25.2786	121.525	2	?	8 to 9	M	?	?	?	1997-05-08	2006	Map position from review by Xu et al 2017
TAIW-05	NMNS6619 (TY9802)	Yamada, Chou et al 2006a	Stranding	Whole skeleton and baleen plates	Skull Morphology	n/a	n/a	n/a	A	Japan/East&South China Sea	Taiwan	Taoyuan County	25.1897	121.401	2	Yes	6.54	M	?	?	?	1998-12-01		Map position from review by Xu et al 2017
TAIW-06	HL20040127	Yamada, Chou et al 2006a	Stranding	Whole skeleton and soft tissues	Skull Morphology	n/a	n/a	n/a	A	Japan/East&South China Sea	Taiwan	Haulien County	23.75	121.6	2	?	5.95	F	?	?	?	2004-01-27	2006	Map position from review by Xu et al 2017
TAIW-07	PCAQ01	Yamada, Chou et al 2006a	Stranding	Incomplete skeleton	Skull Morphology	n/a	n/a	n/a	A	Japan/East&South China Sea	Taiwan	?	?	?	na	?	?	?	?	?	?	?
TAIW-08	n/a	https://www.facebook.com/media/set/?set=oa.993823800737832&type=3 https://www.facebook.com/photo.php?fbid=148131845206113&set=a.142578309094800&type=3&theater	Live Sighting	Photographs	Photographic	n/a	n/a	n/a	A	Japan/East&South China Sea	Taiwan	Haulien City, Haulien County	24.02	121.68	3	n/a	n/a	n/a	n/a	n/a	n/a	2010-08-20	2016	Several posts on Facebook, Cetal Fauna, from Haulien City whale watch, verified by SC
TAIW-09	n/a	https://www.facebook.com/media/set/?set=oa.993823800737832&type=3 https://www.facebook.com/moo.chen.16/posts/1165078880177360 https://www.facebook.com/pg/turumoan/photos/?tab=album&album_id=1014058962018689	Live Sighting	Photographs	Photographic	n/a	n/a	n/a	A	Japan/East&South China Sea	Taiwan	Haulien City, Haulien County	24.02	121.68	3	n/a	n/a	n/a	n/a	n/a	n/a	2016-04-26		Several posts on Facebook, Cetal Fauna, from Haulien City whale watch, verified by SC
TAIW-10	n/a	https://www.facebook.com/media/set/?set=oa.993823800737832&type=3 https://www.facebook.com/moo.chen.16/posts/1171966009488647 https://www.facebook.com/photo.php?fbid=10208481219601751&set=a.10208481219001736&type=3&theater https://www.facebook.com/whaleworld.tw/posts/1229836377050400	Live Sighting	Photographs	Photographic	n/a	n/a	n/a	A	Japan/East&South China Sea	Taiwan	Haulien City, Haulien County	24.02	121.68	3	n/a	n/a	n/a	n/a	n/a	n/a	May and June of 2016		Several posts on Facebook, Cetal Fauna, from Haulien City whale watch, verified by SC
TAIW-11	n/a	https://www.facebook.com/media/set/?set=oa.993823800737832&type=3 https://www.facebook.com/turumoan/posts/1373005152790733 https://www.facebook.com/lanjenfong/media_set?set=a.1590095167669634.1073741918.100000074989914&type=1&hc_location=ufi https://www.facebook.com/photo.php?fbid=10212337223253356&set=a.4333639546838&type=3&theater	Live Sighting	Photographs	Photographic	n/a	n/a	n/a	A	Japan/East&South China Sea	Taiwan	Haulien City, Haulien County	24.02	121.68	3	n/a	n/a	n/a	n/a	n/a	n/a	May of 2017		Several posts on Facebook, Cetal Fauna, from Haulien City whale watch, verified by SC
TAIW-12	n/a	https://www.facebook.com/media/set/?set=oa.993823800737832&type=3 https://www.facebook.com/photo.php?fbid=2017591264926113&set=pcb.2017605621591344&type=3&ifg=1	Live Sighting	Photographs	Photographic	n/a	n/a	n/a	A	Japan/East&South China Sea	Taiwan	Haulien City, Haulien County	24.02	121.68	3	n/a	n/a	n/a	n/a	n/a	n/a	July of 2018		Several posts on Facebook, Cetal Fauna, from Haulien City whale watch, verified by SC
HGKG-01	n/a	Anonymous 1955	Live stranding	Photographs	Photographic	n/a	n/a	n/a	A	Japan/East&South China Sea	Hong Kong	Hong Kong Harbor	22.289	114.169	3	?	8.2	M	n/a	Unk	Immature	1955-04-12	2015	Described in a magazine of the Hong Kong University as an immature fin whale, likely an Omura's from photos and description - SC/RLB
HGKG-02	?	http://hkmarinelife.hk/2014/03/31/whale-carcass-stranded-near-taipo/ http://hkmarinelife.hk/2014/12/23/taipo-whale-identified-as-recently-discovered-omuras-whale/	Stranding	Tissue; whole skeleton	Genetic	?	?	?	A	Japan/East&South China Sea	Hong Kong	Hung Shek Mun, Plover Cove Country Park, Tai Po	22.5042	114.297	3	?	10.8	F?	?	?	Mature	2014-03-29	2014	Genetic verification of speceis identity and stranding data provided by R.L.Brownell Jr & R. Brown, pers. comm. 19 May 2015
VIET-01	?	Chein & Quan 2015	Stranding?	Skull?	Skull Morphology	n/a	n/a	n/a	B	Southeast Asia	Vietnam	Đức Phổ District, Quang Ngai	14.6854	109.085	3	?	ca. 10	?	n/a	n/a	?	?	2015	Source is undated report citing Yamada - Ided by TKY. Skeleton found in Phổ Thạnh temple in Phổ Thạnh commune.
TAIL-01	PMBC11621 (End013)	Yamada, Chou et al 2006a	Stranding	Whole skeleton	Skull Morphology	n/a	n/a	n/a	B	Southeast Asia	Thailand	Phuket Province	7.6989	98.3101	3	?	7	?	?	?	?	1983-09-15	2006
TAIL-02	PMBC11630 (End030)	Yamada, Chou et al 2006a	Stranding	Whole skeleton	Skull Morphology	n/a	n/a	n/a	B	Southeast Asia	Thailand	Phuket Province	7.6989	98.3101	3	?	10	M	?	?	?	1995-06-12
TAIL-03	End156	Yamada, Chou et al 2006a	Stranding	Whole skeleton	Skull Morphology	n/a	n/a	n/a	B	Southeast Asia	Thailand	Phang-nga Province	8.3252	98.5621	3	?	4.3	F	?	?	?	1999-12-01	2006
TAIL-04	n/a	Adulyanukosol et al 2012	Stranding	Photographs	Photographic	n/a	n/a	n/a	B	Southeast Asia	Thailand	Songkhla Pronvince	7.1756	100.614	3	?	4.4	?	n/a	n/a	Juvenile	2011-05-31	2012	Bycaught calf pictured on pg 26+102 of book
TAIL-05	n/a	Adulyanukosol et al 2012	Live Sighting	Report	Visual Report	n/a	n/a	n/a	B	Southeast Asia	Thailand	Phuket Island / Racha Noi-Racha Yai Islands	7.5908	98.3602	3	n/a	n/a	n/a	n/a	n/a	n/a	?		Visual sighting noted on pg 27 of book
TAIL-06	n/a	Adulyanukosol et al 2012	Stranding	Report	Visual Report	n/a	n/a	n/a	B	Southeast Asia	Thailand	Bang Pat, Phang-nga Province	8.3252	98.5621	3	?	4.3	?	n/a	n/a	Juvenile	?		Stranded calf noted on pg 27 of book; possibly = TL03
TAIL-07	n/a	Adulyanukosol et al 2012	Stranding	Report	Visual Report	n/a	n/a	n/a	B	Southeast Asia	Thailand	Thap Sakae, Prachuap Khiri Khan Province	11.5059	99.6414	3	?	3.87	?	n/a	n/a	Juvenile	?	2012	Stranded calf noted on pg 27 of book
TAIL-08	n/a	https://www.youtube.com/watch?v=3JSrl2bd0-g	Live Sighting	Video	Photographic	n/a	n/a	n/a	B	Southeast Asia	Thailand	Tachai Pinnacle, National Park Similan Islands	9.05246	97.8225	3	n/a	n/a	n/a	n/a	n/a	n/a	2013-02-09	2013	Visual ID corroborated by S.Cerchio
INDI-01	n/a	M. Mankeshwar, A. Malavi & D. Sutaria, pers. comm. http://www.marinemammals.in/index.php/database/sightings-strandings/details/1/4887	Live Sighting	Photographs	Photographic	n/a	n/a	n/a	B	Southeast Asia	Andaman Islands / India	Port Blair, South Andaman Island, Andaman and Nicobar Islands	11.69	92.78	3	n/a	~12	n/a	n/a	n/a	n/a	2015-05-05	2017	Visual ID corroborated by S. Cerchio
INDI-02	n/a	M. Mankeshwar, A. Malavi & D. Sutaria, pers. comm. http://www.marinemammals.in/index.php/database/sightings-strandings/details/1/5109 http://www.marinemammals.in/index.php/database/sightings-strandings/details/1/5110	Live Sighting	Photographs	Photographic	n/a	n/a	n/a	B	Southeast Asia	Andaman Islands / India	Cinque Island, Andaman and Nicobar Islands	11.363	92.7946	1	n/a	~12	n/a	n/a	n/a	n/a	2018-04-15	2018	Visual ID corroborated by S. Cerchio
MALA-01	?	Ponnampalam et al 2012	Stranding	Skull	Skull Morphology	n/a	n/a	n/a	B	Southeast Asia	Malaysia	Pahang	4.104	103.403	2	?	n/a	n/a	n/a	n/a	n/a	2008	2012	Spec ID by T.Yamada, pers comm to citation author
PHIL-01	SUML0142	Yamada et al 2008 (also Dolar et al 1994, Perrin et al. 1996, Acebes 2009, 2013, 2014)	Philippines Whaling	Partial Skull	Skull Morphology	n/a	n/a	n/a	B	Southeast Asia	Philippines	Bohol Sea, Lila, Bohol	9.585	124.095	3	No	Unk	Unk	No	Unk	?	1980's	2008	Accts PHIL-01 to 24 refer to Bohol Sea hunt specimens examined by Yamda et al. 2008. This position is that for Lila, Bohol Island from Dolar et al, and Acebes; actual location for specimen is unknown
PHIL-02	SUML0144	Yamada et al 2008 (also Dolar et al 1994, Perrin et al. 1996, Acebes 2009, 2013, 2014)	Philippines Whaling	Partial Skull	Skull Morphology	n/a	n/a	n/a	B	Southeast Asia	Philippines	Bohol Sea, Pamilacan Island	9.484	123.921	3	No	Unk	Unk	No	Unk	?	1980's	2008	Accts PHIL-01 to 24 refer to Bohol Sea hunt specimens examined by Yamda et al. 2008. This position is that for Pamilacan Island from Dolar et al, and Acebes; actual location for specimen is unknown
PHIL-03	SUML0145	Yamada et al 2008 (also Dolar et al 1994, Perrin et al. 1996, Acebes 2009, 2013, 2014)	Philippines Whaling	Partial Skull	Skull Morphology	n/a	n/a	n/a	B	Southeast Asia	Philippines	Bohol Sea, Sagay, Camiguin Island	9.1	124.71	3	No	Unk	Unk	No	Unk	?	1980's	2008	Accts PHIL-01 to 24 refer to Bohol Sea hunt specimens examined by Yamda et al. 2008. This position is that for Sagay, Camiguin Island from Dolar et al, and Acebes; actual location for specimen is unknown
PHIL-04	SUML0148	Yamada et al 2008 (also Dolar et al 1994, Perrin et al. 1996, Acebes 2009, 2013, 2014)	Philippines Whaling	Partial Skull	Skull Morphology	n/a	n/a	n/a	B	Southeast Asia	Philippines	Bohol Sea	-	-	-	No	Unk	Unk	No	Unk	?	1980's		Accts PHIL-01 to 24 refer to Bohol Sea hunt specimens examined by Yamda et al. 2008.
PHIL-05	SUML0149	Yamada et al 2008 (also Dolar et al 1994, Perrin et al. 1996, Acebes 2009, 2013, 2014)	Philippines Whaling	Partial Skull	Skull Morphology	n/a	n/a	n/a	B	Southeast Asia	Philippines	Bohol Sea	-	-	-	No	Unk	Unk	No	Unk	?	1980's		Accts PHIL-01 to 24 refer to Bohol Sea hunt specimens examined by Yamda et al. 2008.
PHIL-06	SUML0150	Yamada et al 2008 (also Dolar et al 1994, Perrin et al. 1996, Acebes 2009, 2013, 2014)	Philippines Whaling	Partial Skull	Skull Morphology	n/a	n/a	n/a	B	Southeast Asia	Philippines	Bohol Sea	-	-	-	No	Unk	Unk	No	Unk	?	1980's		Accts PHIL-01 to 24 refer to Bohol Sea hunt specimens examined by Yamda et al. 2008.
PHIL-07	SUML0151	Yamada et al 2008 (also Dolar et al 1994, Perrin et al. 1996, Acebes 2009, 2013, 2014)	Philippines Whaling	Partial Skull	Skull Morphology	n/a	n/a	n/a	B	Southeast Asia	Philippines	Bohol Sea	-	-	-	No	Unk	Unk	No	Unk	?	1980's		Accts PHIL-01 to 24 refer to Bohol Sea hunt specimens examined by Yamda et al. 2008.
PHIL-08	SUML0152	Yamada et al 2008 (also Dolar et al 1994, Perrin et al. 1996, Acebes 2009, 2013, 2014)	Philippines Whaling	Partial Skull	Skull Morphology	n/a	n/a	n/a	B	Southeast Asia	Philippines	Bohol Sea	-	-	-	No	Unk	Unk	No	Unk	?	1980's		Accts PHIL-01 to 24 refer to Bohol Sea hunt specimens examined by Yamda et al. 2008.
PHIL-09	SUML0153	Yamada et al 2008 (also Dolar et al 1994, Perrin et al. 1996, Acebes 2009, 2013, 2014)	Philippines Whaling	Partial Skull	Skull Morphology	n/a	n/a	n/a	B	Southeast Asia	Philippines	Bohol Sea	-	-	-	No	Unk	Unk	No	Unk	?	1980's		Accts PHIL-01 to 24 refer to Bohol Sea hunt specimens examined by Yamda et al. 2008.
PHIL-10	SUML0156	Yamada et al 2008 (also Dolar et al 1994, Perrin et al. 1996, Acebes 2009, 2013, 2014)	Philippines Whaling	Partial Skull	Skull Morphology	n/a	n/a	n/a	B	Southeast Asia	Philippines	Bohol Sea	-	-	-	No	Unk	Unk	No	Unk	?	1980's		Accts PHIL-01 to 24 refer to Bohol Sea hunt specimens examined by Yamda et al. 2008.
PHIL-11	SUML0157	Yamada et al 2008 (also Dolar et al 1994, Perrin et al. 1996, Acebes 2009, 2013, 2014)	Philippines Whaling	Partial Skull	Skull Morphology	n/a	n/a	n/a	B	Southeast Asia	Philippines	Bohol Sea	-	-	-	No	Unk	Unk	No	Unk	?	1980's		Accts PHIL-01 to 24 refer to Bohol Sea hunt specimens examined by Yamda et al. 2008.
PHIL-12	SUML0208	Yamada et al 2008 (also Dolar et al 1994, Perrin et al. 1996, Acebes 2009, 2013, 2014)	Philippines Whaling	Partial Skull	Skull Morphology	n/a	n/a	n/a	B	Southeast Asia	Philippines	Bohol Sea	-	-	-	No	Unk	Unk	No	Unk	?	1980's		Accts PHIL-01 to 24 refer to Bohol Sea hunt specimens examined by Yamda et al. 2008.
PHIL-13	SUML0209	Yamada et al 2008 (also Dolar et al 1994, Perrin et al. 1996, Acebes 2009, 2013, 2014)	Philippines Whaling	Partial Skull	Skull Morphology	n/a	n/a	n/a	B	Southeast Asia	Philippines	Bohol Sea	-	-	-	No	Unk	Unk	No	Unk	?	1980's		Accts PHIL-01 to 24 refer to Bohol Sea hunt specimens examined by Yamda et al. 2008.
PHIL-14	SUML0210	Yamada et al 2008 (also Dolar et al 1994, Perrin et al. 1996, Acebes 2009, 2013, 2014)	Philippines Whaling	Partial Skull	Skull Morphology	n/a	n/a	n/a	B	Southeast Asia	Philippines	Bohol Sea	-	-	-	No	Unk	Unk	No	Unk	?	1980's		Accts PHIL-01 to 24 refer to Bohol Sea hunt specimens examined by Yamda et al. 2008.
PHIL-15	SUML0211	Yamada et al 2008 (also Dolar et al 1994, Perrin et al. 1996, Acebes 2009, 2013, 2014)	Philippines Whaling	Partial Skull	Skull Morphology	n/a	n/a	n/a	B	Southeast Asia	Philippines	Bohol Sea	-	-	-	No	Unk	Unk	No	Unk	?	1980's		Accts PHIL-01 to 24 refer to Bohol Sea hunt specimens examined by Yamda et al. 2008.
PHIL-16	SUML0212	Yamada et al 2008 (also Dolar et al 1994, Perrin et al. 1996, Acebes 2009, 2013, 2014)	Philippines Whaling	Partial Skull	Skull Morphology	n/a	n/a	n/a	B	Southeast Asia	Philippines	Bohol Sea	-	-	-	No	Unk	Unk	No	Unk	?	1980's		Accts PHIL-01 to 24 refer to Bohol Sea hunt specimens examined by Yamda et al. 2008.
PHIL-17	SUML0213	Yamada et al 2008 (also Dolar et al 1994, Perrin et al. 1996, Acebes 2009, 2013, 2014)	Philippines Whaling	Partial Skull	Skull Morphology	n/a	n/a	n/a	B	Southeast Asia	Philippines	Bohol Sea	-	-	-	No	Unk	Unk	No	Unk	?	1980's		Accts PHIL-01 to 24 refer to Bohol Sea hunt specimens examined by Yamda et al. 2008.
PHIL-18	SUML0215	Yamada et al 2008 (also Dolar et al 1994, Perrin et al. 1996, Acebes 2009, 2013, 2014)	Philippines Whaling	Partial Skull	Skull Morphology	n/a	n/a	n/a	B	Southeast Asia	Philippines	Bohol Sea	-	-	-	No	Unk	Unk	No	Unk	?	1980's		Accts PHIL-01 to 24 refer to Bohol Sea hunt specimens examined by Yamda et al. 2008.
PHIL-19	SUML0217	Yamada et al 2008 (also Dolar et al 1994, Perrin et al. 1996, Acebes 2009, 2013, 2014)	Philippines Whaling	Partial Skull	Skull Morphology	n/a	n/a	n/a	B	Southeast Asia	Philippines	Bohol Sea	-	-	-	No	Unk	Unk	No	Unk	?	1980's		Accts PHIL-01 to 24 refer to Bohol Sea hunt specimens examined by Yamda et al. 2008.
PHIL-20	SUML0218	Yamada et al 2008 (also Dolar et al 1994, Perrin et al. 1996, Acebes 2009, 2013, 2014)	Philippines Whaling	Partial Skull	Skull Morphology	n/a	n/a	n/a	B	Southeast Asia	Philippines	Bohol Sea	-	-	-	No	Unk	Unk	No	Unk	?	1980's		Accts PHIL-01 to 24 refer to Bohol Sea hunt specimens examined by Yamda et al. 2008.
PHIL-21	SUML0219	Yamada et al 2008 (also Dolar et al 1994, Perrin et al. 1996, Acebes 2009, 2013, 2014)	Philippines Whaling	Partial Skull	Skull Morphology	n/a	n/a	n/a	B	Southeast Asia	Philippines	Bohol Sea	-	-	-	No	Unk	Unk	No	Unk	?	1980's		Accts PHIL-01 to 24 refer to Bohol Sea hunt specimens examined by Yamda et al. 2008.
PHIL-22	SUML0220	Yamada et al 2008 (also Dolar et al 1994, Perrin et al. 1996, Acebes 2009, 2013, 2014)	Philippines Whaling	Partial Skull	Skull Morphology	n/a	n/a	n/a	B	Southeast Asia	Philippines	Bohol Sea	-	-	-	No	Unk	Unk	No	Unk	?	1980's		Accts PHIL-01 to 24 refer to Bohol Sea hunt specimens examined by Yamda et al. 2008.
PHIL-23	SUML0221	Yamada et al 2008 (also Dolar et al 1994, Perrin et al. 1996, Acebes 2009, 2013, 2014)	Philippines Whaling	Partial Skull	Skull Morphology	n/a	n/a	n/a	B	Southeast Asia	Philippines	Bohol Sea	-	-	-	No	Unk	Unk	No	Unk	?	1980's		Accts PHIL-01 to 24 refer to Bohol Sea hunt specimens examined by Yamda et al. 2008.
PHIL-24	SUML0475	Yamada et al 2008 (also Dolar et al 1994, Perrin et al. 1996, Acebes 2009, 2013, 2014)	Philippines Whaling	Partial Skull	Skull Morphology	n/a	n/a	n/a	B	Southeast Asia	Philippines	Bohol Sea	-	-	-	No	Unk	Unk	No	Unk	?	1980's		Accts PHIL-01 to 24 refer to Bohol Sea hunt specimens examined by Yamda et al. 2008.
PHIL-26	?	Aragones et al 2010	Stranding	?	Visual Report	n/a	n/a	n/a	B	Southeast Asia	Philippines	Not reported	?	?		?	?	?	?	?	?	2 between 1998-2009	2010	No information on local or date or how identified
PHIL-27	n/a	L. Dolar pers comm	Stranding	Tissue	Genetic	?	?	?	B	Southeast Asia	Philippines	Manila Bay	14.5	120.73	3	?	?	?	?	?	?	2008	2010	Came in on the bow of a boat; Gen ID by SWFSC
PHIL-28	n/a	L. Dolar pers comm	Live Sighting	Photographs	Photographic	n/a	n/a	n/a	B	Southeast Asia	Philippines	Northeastern Sulu Sea	11.83	120.76	3	n/a	n/a	n/a	n/a	n/a	n/a	2010	2016	photo by Aris Saluta, from L. Dolar, verified by SC
PHIL-29	n/a	Dugong Dive Center https://www.facebook.com/DugongDiveCenterPH/photos/a.796355213734087/956178647751742/?type=3&theater	Live Sighting	Photographs	Photographic	n/a	n/a	n/a	B	Southeast Asia	Philippines	Busuanga Island, Palawan, Philippines	12.26	120.14	3	n/a	n/a	n/a	n/a	n/a	n/a	2016-02-08	2016	photo posted by Dugong Dive Center, Coron, Philippines, verified by SC
COCI-01	NRIFSF7	Wada et al 2003; Yoshida & Kato 1999; Wada and Numachi 1991; Ohsumi 1980	Research Whaling	Tissue	Genetic	AB116097	mtDNA complete control region 938bp	C	C	Southeast Indian Ocean / Indonesia	Cocos (Keeling) Islands	Cocos (Keeling) Islands	-10.85	97.0333	1	1 (R)	10.4	F	0-4	19	Adult	1978-11-15	2003
COCI-02	NRIFSF8	Wada et al 2003; Yoshida & Kato 1999; Wada and Numachi 1991; Ohsumi 1980	Research Whaling	Tissue	Genetic	not sequenced?	n/a	?	C	Southeast Indian Ocean / Indonesia	Cocos (Keeling) Islands	Cocos (Keeling) Islands	-10.8667	94.4833	1	1 (R)	10.1	F	0-3	18	Immature	1978-11-17	2003
INDO-01	n/a	Weber 1923 Taf .1 Fig. 1 & Taf.2 Fig 1-8	Stranding	Skull and some skeleton	Skull Morphology	n/a	n/a	n/a	C	Southeast Indian Ocean / Indonesia	Indonesia	Bangsri / Brebes, Java	-6.43333	110.733	3	No	n/a	n/a	n/a	n/a	n/a	1907-10-25	2017	Photos of skull examined by TKY: Weber described that the local peole open the cranial cavity to remove the brain. At least based on Google Map information, Bangsri and Breves are somewhat distant two places. I can not check these names in the past, but supposing the first name could be closer to the actual point? Co-ordinate data are rouugh estimate for Bangsri.
INDO-02	n/a	Weber 1923 Taf.1 Fig. 3; Egami and Kojima 2017	Stranding	Skull	Skull Morphology	n/a	n/a	n/a	C	Southeast Indian Ocean / Indonesia	Indonesia	Lamakera, Solor	-8.41667	123.167	3	No	n/a	n/a	n/a	n/a	n/a	?	2017	Photos of skull examined by TKY
INDO-03	n/a	Kahn 2001; Kahn et al. 2001	Live Sighting	Sighting	Visual Report	n/a	n/a	n/a	C	Southeast Indian Ocean / Indonesia	Indonesia	Gili Mota, Komodo National Park	-8.7932	119.794	2	n/a	n/a	n/a	n/a	n/a	n/a	October 1999	2016	Multiple Sightings in Report, not corroborated with photos. First reported as omurai by Yamada 2009
INDO-04	?	Kahn et al 2001; Kahn 2001	Live Sighting	Tissue (Biospy)	Genetic	?	?	?	C	Southeast Indian Ocean / Indonesia	Indonesia	Loh Dasami, Nusa Kode Strait, Komodo National Park	-8.7892	119.642	2	n/a	n/a	n/a	n/a	n/a	n/a	October 2000	2016	Biopsy with Species ID by SWFSC
INDO-05	n/a	Kahn 2001	Live Sighting	Sighting	Visual Report	n/a	n/a	n/a	C	Southeast Indian Ocean / Indonesia	Indonesia	Komodo National Park	-8.7825	119.66	2	n/a	n/a	n/a	n/a	n/a	n/a	April & Oct 2000		Multiple Sightings in Report, not corroborated with photos.
INDO-06	n/a	Kahn 2005	Live Sighting	Photographs	Photographic	n/a	n/a	n/a	C	Southeast Indian Ocean / Indonesia	Indonesia	Uluwatu, South Bali	-8.87	115.07	2	n/a	n/a	n/a	n/a	n/a	n/a	January 2005	2017	Photos in report corroborated by S. Cerchio
INDO-07	n/a	Whale Stranding Indonesia https://www.instagram.com/p/BF5VkQ9J9z8/ https://www.facebook.com/WhaleStrandingIndonesia/photos/a.325985077512789.72804.325189824258981/944684412309516/?type=3	Live Sighting	Aerial photographs	Photographic	n/a	n/a	n/a	C	Southeast Indian Ocean / Indonesia	Indonesia	Ora Beach, North Seram	-2.85	129.15	3	n/a	n/a	n/a	n/a	n/a	n/a	2016-05-26	2016	Visual ID corroborated by S. Cerchio
INDO-08	?	Whale Stranding Indonesia http://www.whalestrandingindonesia.com/stranding-database.html#home/viewmaindatumdetails/56b1890ea7eb00b835ad704e/	Stranding	Photographs	Photographic	n/a	n/a	n/a	C	Southeast Indian Ocean / Indonesia	Indonesia	Batu Bolong, Canggu, Kuta Bali	-8.66	115.13	2	?	?	?	?	?	Neonate	2016-02-02	2016	Neonate stranding, very young calf, with strong ridges but unambiguous asymmetrical jaw coloration and indication of right blaze, recorded as B.edeni. Confident attribution to B.omurai - S. Cerchio
INDO-09a	n/a	Alex Lindbloom pers. comm. https://www.youtube.com/watch?v=ua1mXf-JFvs https://www.youtube.com/watch?v=5o16v3_41i8 http://birdsheadseascape.com/photography/omuras-whale-alex-lindbloom/	Live Sighting	Aerial photographs	Photographic	n/a	n/a	n/a	C	Southeast Indian Ocean / Indonesia	Indonesia	East Boo Island, Raja Ampat	-2.2224	130.61	1	n/a	n/a	n/a	n/a	n/a	n/a	2016-11-25	2016	Alex Lindbloom Sighting 1: East Boo Island: S 02. 13.344 E 130.36. 572 Date & Time: 11/25/2016 From 9:00 AM and remained in the area until after dark Behavior: Solitary whale, Lunge feeding, at times very close to island (10 meters away)
INDO-09b	n/a	Alex Lindbloom pers. comm. https://www.youtube.com/watch?v=ua1mXf-JFvs https://www.youtube.com/watch?v=5o16v3_41i8 http://birdsheadseascape.com/photography/omuras-whale-alex-lindbloom/	Live Sighting	Aerial photographs	Photographic	n/a	n/a	n/a	C	Southeast Indian Ocean / Indonesia	Indonesia	Misool-Yilliet, Raja Ampat	-2.15555	130.586	1	n/a	n/a	n/a	n/a	n/a	n/a	2016-11-26		Alex Lindbloom Sighting 2: Just off of the dive site 'Anti-Chovies' in Misool-Yilliet Area S 02. 09. 333 E 130. 35. 149 Date & Time: 11/26/2017 Around 10:00 AM and continued until around 2:00 PM Behavior: Possibly three individuals. One solitary (in the video) but later we saw a mother and her calf (in the photos) At times they were lunge feeding but not on the surface, seemed to take place sever…
INDO-09c	n/a	Alex Lindbloom pers. comm. https://www.youtube.com/watch?v=ua1mXf-JFvs https://www.youtube.com/watch?v=5o16v3_41i8 http://birdsheadseascape.com/photography/omuras-whale-alex-lindbloom/	Live Sighting	Aerial photographs	Photographic	n/a	n/a	n/a	C	Southeast Indian Ocean / Indonesia	Indonesia	Misool Island, Raja Ampat	-2.19133	130.606	1	n/a	n/a	n/a	n/a	n/a	n/a	2016-11-26		Alex Lindbloom Sighting 3: S 02 11.480 E130 36.358 Date & Time: 11/26/2017 4:00 PM- 6:30 PM Behavior: Possibly three individuals. One solitary (in the video) but later we saw a mother and her calf (in the photos) At times they were lunge feeding but not on the surface, seemed to take place several meters bellow the surface. The mother seemed to be teaching the calf how to feed. She would go throu…
INDO-10	n/a	S. Boonyaguekul https://www.facebook.com/zoopod/videos/1290667037637149/ https://www.facebook.com/zoopod/videos/1290634154307104 https://www.facebook.com/zoopod/posts/1287017024668817 https://www.facebook.com/zoopod/posts/1287006578003195	Live Sighting	Aerial photographs	Photographic	n/a	n/a	n/a	C	Southeast Indian Ocean / Indonesia	Indonesia	Dampier Strait, Pulau Mansuar, Raja Ampat	-0.6	130.6	3	n/a	n/a	n/a	n/a	n/a	n/a	April of 2017	2017	Details reported by Nick Dean to RLB
INDO-11	n/a	Whale Stranding Indonesia http://www.whalestrandingindonesia.com/stranding-database.html#home/viewmaindatumdetails/5a84d99b6f194c3d98921c40/	Live stranding	Photographs	Photographic	n/a	n/a	n/a	C	Southeast Indian Ocean / Indonesia	Indonesia	Kampung Sensong, Sangihe, North Sulawesi	3.58	125.57	2	n/a	3	n/a	n/a	n/a	n/a	2017-09-15	2017	Neonate stranding, young calf, recorded as B.edeni. Looks like B.omurai from size and morphology - S. Cerchio
INDO-12	n/a	Daniele Kreb, pers.comm.	Live Sighting	Photographs	Photographic	n/a	n/a	n/a	C	Southeast Indian Ocean / Indonesia	Indonesia	Sandaran, East Kutai District, East Kalimantan	0.859172	118.887	1	n/a	n/a	n/a	n/a	n/a	n/a	2010-05-05	2018	Group of 4 individuals seperated from each other 500m-1km, actively feeding, krill visible in surface. near shoreline feeding between 60m-180km depth clines, narrow shelf with steep drop off. Photos verified by SC
INDO-13	n/a	Daniele Kreb, pers.comm.	Live Sighting	Photographs	Photographic	n/a	n/a	n/a	C	Southeast Indian Ocean / Indonesia	Indonesia	Teluk Sumbang, Teluk Sulaiman, East Kalimantan	1.0748	118.898	1	n/a	n/a	n/a	n/a	n/a	n/a	2016-06-21		2 individuals seperated 1km each & feeding (no pics) & 2 individuals 4km from first group - feeding. Photos verified by SC.
INDO-14	n/a	Daniele Kreb, pers.comm.	Live Sighting	Photographs	Photographic	n/a	n/a	n/a	C	Southeast Indian Ocean / Indonesia	Indonesia	Teluk Sulaiman, East Kalimantan	1.11242	118.83	1	n/a	n/a	n/a	n/a	n/a	n/a	2016-06-22		Pair (mother & calf), feeding. Photos verified by SC
INDO-15	n/a	Daniele Kreb, pers.comm., Loka KKPN Pekanbaru http://lkkpnpekanbaru.kkp.go.id/tim-monitoring-cetacean-temukan-kemunculan-2-spesies-yang-melengkapi-6-spesies-cetacean-di-kawasan-konservasi-twp-pieh	Live Sighting	Photographs	Photographic	n/a	n/a	n/a	C	Southeast Indian Ocean / Indonesia	Indonesia	Palau Pieh, Padang, West Sumatra	-0.880086	100.143	1	n/a	n/a	n/a	n/a	n/a	n/a	2018-09-26	2018	Photos verified by SC
INDO-16	n/a	Daniele Kreb, pers.comm., Loka KKPN Pekanbaru http://lkkpnpekanbaru.kkp.go.id/tim-monitoring-cetacean-temukan-kemunculan-2-spesies-yang-melengkapi-6-spesies-cetacean-di-kawasan-konservasi-twp-pieh	Live Sighting	Photographs	Photographic	n/a	n/a	n/a	C	Southeast Indian Ocean / Indonesia	Indonesia	Palau Pieh, Padang, West Sumatra	-0.877967	100.155	1	n/a	n/a	n/a	n/a	n/a	n/a	2018-09-27		Photos verified by SC
AUST-01	South Australian Museum M21245	Yamada, Kemper et al 2006b	Stranding	Whole skeleton	Skull Morphology	n/a	n/a	n/a	C	Southeast Indian Ocean / Indonesia	Australia	Black Point, Yorke Peninsula, Gulf St Vincent, South Australia	-34.6261	137.939	1	All (L&R)	10.2	Unk	n/a	Unk	Subadult	2000-01-17	2006	Data on stranding provided by the South Australian Museum, C. Kemper, Pers. Comm. 1 Sept 2015
AUST-02	n/a	http://www.pbase.com/wildlifeimages/omuras_whale	Live Sighting	Photographs	Photographic	n/a	n/a	n/a	C	Southeast Indian Ocean / Indonesia	Australia	north of the Lacapede Islands	-16.87	122.16	3	n/a	n/a	n/a	n/a	n/a	n/a	2009-11-02	2015	Visual ID corroborated by S. Cerchio
AUST-03	?	Ottewell et al 2016	Stranding	Tissue, photographs	Genetic	KT757371	mtDNA complete control region 938bp	A?	C	Southeast Indian Ocean / Indonesia	Australia	Exmouth	-21.8177	114.187	1	?	5.68	F	?	Unk	Juvenile	2015-03-15	2016	Details provided in published note
AUST-04	n/a	Simon Mustoe, pers. Comm. http://au.whales.wildiaries.com/trips/10341	Live Sighting	Photographs	Photographic	n/a	n/a	n/a	C	Southeast Indian Ocean / Indonesia	Australia	Timor Sea	-12.08	127.39	2	n/a	n/a	n/a	n/a	n/a	n/a	2010-10-28	2015	Visual ID corroborated by S. Cerchio
AUST-05	n/a	Lyn Irvine, pers. comm.	Live Sighting	Aerial photographs	Photographic	n/a	n/a	n/a	C	Southeast Indian Ocean / Indonesia	Australia	Pilbara Coastal Region	-20.2	116.98	2	n/a	n/a	n/a	n/a	n/a	n/a	2010-01-17	2016	Visual ID corroborated by S. Cerchio; 10 whales sighted on 3 separate days, 1/17/10, 3/2/10, and 3/22/10 during aerial surveys spanning Aug 2009 to July 2010.
AUST-06	n/a	Lyn Irvine, pers. comm.	Live Sighting	Aerial photographs	Photographic	n/a	n/a	n/a	C	Southeast Indian Ocean / Indonesia	Australia	Pilbara Coastal Region	-20.28	117.36	2	n/a	n/a	n/a	n/a	n/a	n/a	2010-03-02		Visual ID corroborated by S. Cerchio; 10 whales sighted on 3 separate days, 1/17/10, 3/2/10, and 3/22/10 during aerial surveys spanning Aug 2009 to July 2010.
AUST-07	n/a	Lyn Irvine, pers. comm.	Live Sighting	Aerial photographs	Photographic	n/a	n/a	n/a	C	Southeast Indian Ocean / Indonesia	Australia	Pilbara Coastal Region	-20.325	117.18	2	n/a	n/a	n/a	n/a	n/a	n/a	2010-03-22		Visual ID corroborated by S. Cerchio; 10 whales sighted on 3 separate days, 1/17/10, 3/2/10, and 3/22/10 during aerial surveys spanning Aug 2009 to July 2010.
AUST-08	n/a	McCauley 2009	Acoustic	Acoustic	Acoustic	n/a	n/a	n/a	C	Southeast Indian Ocean / Indonesia	Australia	Exmouth	-21.58	113.9	2	n/a	n/a	n/a	n/a	n/a	n/a	2000, 2004-2005	2017	Acoustic monitoring, attributed to Bryde's but now recognized as Omura's
AUST-09	n/a	McCauley 2009	Acoustic	Acoustic	Acoustic	n/a	n/a	n/a	C	Southeast Indian Ocean / Indonesia	Australia	North of Monte Bello Islands	-19.82	115.21	2	n/a	n/a	n/a	n/a	n/a	n/a	Dec-2005 to Nov-2006	2017	Acoustic monitoring, attributed to Bryde's but now recognized as Omura's
AUST-10	n/a	McCauley 2009	Acoustic	Acoustic	Acoustic	n/a	n/a	n/a	C	Southeast Indian Ocean / Indonesia	Australia	Northwest of Broome	-16.6	120.9	2	n/a	n/a	n/a	n/a	n/a	n/a	Mar-2003 to Aug-2003	2017	Acoustic monitoring, attributed to Bryde's but now recognized as Omura's
AUST-11	n/a	McCauley 2009; McCauley 2011	Acoustic	Acoustic	Acoustic	n/a	n/a	n/a	C	Southeast Indian Ocean / Indonesia	Australia	Scotts Reef, Scott East-4	-14.0507	121.848	1	n/a	n/a	n/a	n/a	n/a	n/a	2006-2008	2017	Acoustic monitoring, attributed to Bryde's but now recognized as Omura's
AUST-12	n/a	McCauley 2009; McCauley 2011	Acoustic	Acoustic	Acoustic	n/a	n/a	n/a	C	Southeast Indian Ocean / Indonesia	Australia	Scotts Reef, Scott West-4	-14.038	121.785	1	n/a	n/a	n/a	n/a	n/a	n/a	2006-2008		Acoustic monitoring, attributed to Bryde's but now recognized as Omura's
AUST-13	n/a	McCauley 2009; McCauley 2011	Acoustic	Acoustic	Acoustic	n/a	n/a	n/a	C	Southeast Indian Ocean / Indonesia	Australia	Scotts Reef, Scott South-1	-14.3836	122.384	1	n/a	n/a	n/a	n/a	n/a	n/a	2006-2008	2017	Acoustic monitoring, attributed to Bryde's but now recognized as Omura's
AUST-14	n/a	McCauley 2009; McCauley 2011	Acoustic	Acoustic	Acoustic	n/a	n/a	n/a	C	Southeast Indian Ocean / Indonesia	Australia	Scotts Reef, Scott South-2	-14.3333	122.333	1	n/a	n/a	n/a	n/a	n/a	n/a	2006-2008		Acoustic monitoring, attributed to Bryde's but now recognized as Omura's
AUST-15	n/a	McCauley 2009; McCauley 2011	Acoustic	Acoustic	Acoustic	n/a	n/a	n/a	C	Southeast Indian Ocean / Indonesia	Australia	Scotts Reef, Scott South-3	-14.3321	122.332	1	n/a	n/a	n/a	n/a	n/a	n/a	2006-2008		Acoustic monitoring, attributed to Bryde's but now recognized as Omura's
AUST-16	n/a	McCauley 2009	Acoustic	Acoustic	Acoustic	n/a	n/a	n/a	C	Southeast Indian Ocean / Indonesia	Australia	Serangipatan Reef	-13.83	122.12	2	n/a	n/a	n/a	n/a	n/a	n/a	2006-2008	2017	Acoustic monitoring, attributed to Bryde's but now recognized as Omura's
AUST-17	n/a	McCauley 2009	Acoustic	Acoustic	Acoustic	n/a	n/a	n/a	C	Southeast Indian Ocean / Indonesia	Australia	NW Browse Island	-13.82	123.27	2	n/a	n/a	n/a	n/a	n/a	n/a	2006-2008	2017	Acoustic monitoring, attributed to Bryde's but now recognized as Omura's
AUST-18	n/a	McCauley 2009	Acoustic	Acoustic	Acoustic	n/a	n/a	n/a	C	Southeast Indian Ocean / Indonesia	Australia	Maret Islands, Kimberley Coast	-14.39	124.87	2	n/a	n/a	n/a	n/a	n/a	n/a	2006-2008	2017	Acoustic monitoring, attributed to Bryde's but now recognized as Omura's
AUST-19	n/a	McCauley 2014	Acoustic	Acoustic	Acoustic	n/a	n/a	n/a	C	Southeast Indian Ocean / Indonesia	Australia	Joseph Bonaparte Gulf, JBG_S-1	-13.1297	128.191	1	n/a	n/a	n/a	n/a	n/a	n/a	Oct-2010 to Sep-2013	2017	Acoustic monitoring, attributed to Bryde's but now recognized as Omura's
AUST-20	n/a	McCauley 2014	Acoustic	Acoustic	Acoustic	n/a	n/a	n/a	C	Southeast Indian Ocean / Indonesia	Australia	Joseph Bonaparte Gulf, JBG_N-1	-12.934	128.398	1	n/a	n/a	n/a	n/a	n/a	n/a	Oct-2010 to Sep-2013		Acoustic monitoring, attributed to Bryde's but now recognized as Omura's
AUST-21	n/a	McCauley 2009	Acoustic	Acoustic	Acoustic	n/a	n/a	n/a	C	Southeast Indian Ocean / Indonesia	Australia	Shelfbreak North of Darwin	-9.5	129	3	n/a	n/a	n/a	n/a	n/a	n/a	2009	2017	Acoustic monitoring, attributed to Bryde's but now recognized as Omura's
AUST-22	n/a	McPherson et al. 2016a https://www.acoustics.asn.au/conference_proceedings/AASNZ2016/papers/p19.pdf	Acoustic	Acoustic	Acoustic	n/a	n/a	n/a	C	Southeast Indian Ocean / Indonesia	Australia	Northwest Timor Sea	-12.25	124.45	2	n/a	n/a	n/a	n/a	n/a	n/a	Jun-Oct 2011	2016	Acoustic monitoring, attributed to Omura's whales based on Cerchio et al 2015. Recordings by JASCO off a Mobile Offshore Driling Unit (MODU) during June-October 2011. Attribution by authors with corroborative longterm spectrogram.
AUST-23a	n/a	McPherson et al. 2016b https://static.conocophillips.com/files/resources/appendix-e-2.pdf	Acoustic	Acoustic	Acoustic	n/a	n/a	n/a	C	Southeast Indian Ocean / Indonesia	Australia	Timor Sea, Borossa field, J1	-9.94855	129.814	1	n/a	n/a	n/a	n/a	n/a	n/a	Jul-2014 to Jul-2015	2016	Acoustic monitoring, attributed to Omura's whales based on Cerchio et al 2015. Recordings by JASCO in Timor Sea, Borossa Field, Recorder J1. Attribution by authors with corraborative detail spectrograms
AUST-23b	n/a	McPherson et al. 2016b https://static.conocophillips.com/files/resources/appendix-e-2.pdf	Acoustic	Acoustic	Acoustic	n/a	n/a	n/a	C	Southeast Indian Ocean / Indonesia	Australia	Timor Sea, Borossa field, J2	-9.83267	130.289	1	n/a	n/a	n/a	n/a	n/a	n/a	Jul-2014 to Jul-2015		Acoustic monitoring, attributed to Omura's whales based on Cerchio et al 2015. Recordings by JASCO in Timor Sea, Borossa Field, Recorder J2. Attribution by authors with corraborative detail spectrograms
AUST-23c	n/a	McPherson et al. 2016b https://static.conocophillips.com/files/resources/appendix-e-2.pdf	Acoustic	Acoustic	Acoustic	n/a	n/a	n/a	C	Southeast Indian Ocean / Indonesia	Australia	Timor Sea, Borossa field, J3	-10.0953	130.096	1	n/a	n/a	n/a	n/a	n/a	n/a	Jul-2014 to Jul-2015		Acoustic monitoring, attributed to Omura's whales based on Cerchio et al 2015. Recordings by JASCO in Timor Sea, Borossa Field, Recorder J3. Attribution by authors with corraborative detail spectrograms
AUST-24	n/a	Integrated Marine Observing System (IMOS) https://acoustic.aodn.org.au/acoustic/	Acoustic - IMOS hydrophones	Acoustic	Acoustic	n/a	n/a	n/a	C	Southeast Indian Ocean / Indonesia	Australia	Pilbara Shelf	-19.3833	115.917	1	n/a	n/a	n/a	n/a	n/a	n/a	Nov-2012 to Sep-2013	2015	Acoustic monitoring, public records, confirmed by SC
AUST-25	n/a	Integrated Marine Observing System (IMOS) https://acoustic.aodn.org.au/acoustic/	Acoustic - IMOS hydrophones	Acoustic	Acoustic	n/a	n/a	n/a	C	Southeast Indian Ocean / Indonesia	Australia	Kimberley Shelf	-15.4833	121.25	1	n/a	n/a	n/a	n/a	n/a	n/a	Nov-2012 to Sep-2013	2015	Acoustic monitoring, public records, confirmed by SC
AUST-26	n/a	Centre for Whale Research http://www.cwr.org.au/fremantle-to-hobart-blog-chapter-6.html	Live Sighting	Photographs	Photographic	n/a	n/a	n/a	C	Southeast Indian Ocean / Indonesia	Australia	Heywood Shoals	-13.48	124.06	3	n/a	n/a	n/a	n/a	n/a	n/a	2013-10-26	2015	Ided as Bryde's, with acoustics and photograph; Visual ID as Omura's corroborated by S. Cerchio
AUST-27	n/a	Lyn Irvine, pers. comm.	Live Sighting	Aerial photographs	Photographic	n/a	n/a	n/a	C	Southeast Indian Ocean / Indonesia	Australia	Northwest Cape / Exmouth	-21.66	114.13	3	n/a	n/a	n/a	n/a	n/a	n/a	19 & 22 May 2017	2017	Visual ID from aerial photos corroborated by S. Cerchio
AUST-28	n/a	Lyn Irvine, pers. comm.	Live Sighting	Aerial photographs	Photographic	n/a	n/a	n/a	C	Southeast Indian Ocean / Indonesia	Australia	Northwest Cape / Exmouth	-21.66	114.13	3	n/a	n/a	n/a	n/a	n/a	n/a	2018-03-12		Visual ID from aerial photos corroborated by S. Cerchio
AUST-29	n/a	Lyn Irvine, pers. comm. https://www.facebook.com/permalink.php?story_fbid=1664475753622059&id=958722754197366	Live Sighting	Aerial photographs	Photographic	n/a	n/a	n/a	C	Southeast Indian Ocean / Indonesia	Australia	Northwest Cape / Exmouth	-21.66	114.13	3	n/a	n/a	n/a	n/a	n/a	n/a	2018-04-16		Visual ID from aerial photos corroborated by S. Cerchio
AUST-06	n/a	Justin Meager and Chris Jones, pers. comm. https://www.facebook.com/GreatBarrierReefMarinePark/videos/1283672321693302/	Live Sighting	Photographs	Photographic	n/a	n/a	n/a	D	Oceania	Australia	Mission Beach, Great Barrier Reef Marine Park, Queensland	-17.8832	146.308	3	n/a	n/a	n/a	n/a	n/a	n/a	2016-11-26	2016	Video from Chris Jones, corroborated by S. Cerchio
AUST-07	n/a	Justin Meager and Chris Jones, pers. comm. http://www.earthtouchnews.com/oceans/whales-and-dolphins/worlds-most-elusive-whale-filmed-on-the-great-barrier-reef	Live Sighting	Photographs	Photographic	n/a	n/a	n/a	D	Oceania	Australia	Port Douglas, Queensland	-16.4229	145.595	3	n/a	n/a	n/a	n/a	n/a	n/a	2016-12-08	2016	Photos and video from Chris Jones, corroborated by S. Cerchio
SOLI-01	NRIFSF1	Wada et al 2003; Yoshida & Kato 1999; Wada and Numachi 1991; Ohsumi 1980	Research Whaling	Tissue	Genetic	AB116096; AF146389	mtDNA complete control region 938bp	B	D	Oceania	Solomon Islands	Soloman Sea ca 200km west of Guadalcanal	-10.05	157.483	1	1 (R)	11.5	F	1.0/11.0	29	Adult	1976-10-24	2003
SOLI-02	NRIFSF2	Wada et al 2003; Yoshida & Kato 1999; Wada and Numachi 1991; Ohsumi 1980	Research Whaling	Tissue	Genetic	not uploaded	mtDNA partial control region 376bp	B	D	Oceania	Solomon Islands	Soloman Sea ca 200km west of Guadalcanal	-9.88333	157.617	1	1 (L)	9.6	M	1.9/1.7	38	Adult	1976-10-24
SOLI-03	NRIFSF3	Wada et al 2003; Yoshida & Kato 1999; Wada and Numachi 1991; Ohsumi 1980	Research Whaling	Tissue	Genetic	not uploaded	mtDNA partial control region 376bp	B	D	Oceania	Solomon Islands	Soloman Sea ca 200km west of Guadalcanal	-9.95	157.683	1	1 (L)	11.2	F	0-6	9	Adult	1976-10-24
SOLI-04	NRIFSF4	Wada et al 2003; Yoshida & Kato 1999; Wada and Numachi 1991; Ohsumi 1980	Research Whaling	Tissue	Genetic	not uploaded	mtDNA partial control region 376bp	B	D	Oceania	Solomon Islands	Soloman Sea ca 200km west of Guadalcanal	-9.81667	157.483	1	1 (L)	10	M	1.6/1.5	21	Adult	1976-10-24
SOLI-05	NRIFSF5	Wada et al 2003; Yoshida & Kato 1999; Wada and Numachi 1991; Ohsumi 1980	Research Whaling	Tissue	Genetic	not uploaded	mtDNA partial control region 376bp	B	D	Oceania	Solomon Islands	Soloman Sea ca 200km west of Guadalcanal	-10.1167	157.85	1	1 (L)	10.3	F	1.0/12.0	23	Adult	1976-10-24
SOLI-06	NRIFSF6	Wada et al 2003; Ohsumi 1980	Research Whaling	Tissue	Genetic	not sequenced?	?	?	D	Oceania	Solomon Islands	Soloman Sea ca 200km west of Guadalcanal	-10.2833	157.933	1	19 (R)†	9.6	M	2.2/2.1	34	Adult	1976-10-24
SOLI-07	n/a	Oremus et al. 2011	Live Sighting	Photographs	Photographic	n/a	n/a	n/a	D	Oceania	Solomon Islands	Malaita Island, west side	-8.91	160.72	2	n/a	n/a	n/a	n/a	n/a	n/a	November of 2009	2011
SOLI-08	n/a	Oremus et al. 2011	Live Sighting	Photographs	Photographic	n/a	n/a	n/a	D	Oceania	Solomon Islands	Sandfly Passage, Nggela (Florida) Islands	-9.016	160.1	2	n/a	n/a	n/a	n/a	n/a	n/a	2010-11-14
SOLI-09	n/a	Oremus et al. 2011	Live Sighting	Photographs	Photographic	n/a	n/a	n/a	D	Oceania	Solomon Islands	Isatabu (Guadalcanal), northeast side	-9.33	159.85	2	n/a	n/a	n/a	n/a	n/a	n/a	November of 2010
NCAL-01	n/a	Garrigue and Poupon 2013, C. Garrigue pers. comm	Live Sighting	Photographs	Photographic	n/a	n/a	n/a	D	Oceania	New Caledonia	South New Caledonia	-22.5131	166.797	1	n/a	n/a	n/a	n/a	n/a	n/a	2010-11-17	2013	Sightings reported from 1997 to 2014; data provided by C. Garrigue, pers. comm. 15 Sept 2015
NCAL-02	n/a	Marine Education and Research Society https://mersociety.wordpress.com/2012/11/07/extraordinarily-rare-whale-sighting-omuras-whale-balaenoptera-omurai/	Live Sighting	Photographs	Photographic	n/a	n/a	n/a	D	Oceania	New Caledonia	South New Caledonia	-22.5	166.993	1	n/a	n/a	n/a	n/a	n/a	n/a	2012-05-14		Visual ID corroborated by S. Cerchio
NCAL-03	n/a	Van Canneyt et al 2015	Live Sighting	Photographs	Photographic	n/a	n/a	n/a	D	Oceania	New Caledonia	Northeast New Caledonia	-20.5237	165.021	1	n/a	n/a	n/a	n/a	n/a	n/a	2014-11-13	2015	Three visual sightings reported during aerial surveys
NCAL-04	n/a	Van Canneyt et al 2015	Live Sighting	Photographs	Photographic	n/a	n/a	n/a	D	Oceania	New Caledonia	Northeast New Caledonia	-20.8127	165.442	1	n/a	n/a	n/a	n/a	n/a	n/a	2014-11-13		Three visual sightings reported during aerial surveys
NCAL-05	n/a	Van Canneyt et al 2015	Live Sighting	Photographs	Photographic	n/a	n/a	n/a	D	Oceania	New Caledonia	Southeast New Caledonia	-21.7635	166.703	1	n/a	n/a	n/a	n/a	n/a	n/a	2014-11-17	2015	Three visual sightings reported during aerial surveys
IRAN-01	QE22.09.2007	Ranjbar et al 2016	Stranding	Photographs	Photographic	??	??	n/a	E	Northwest Indian Ocean / Red Sea	Iran	Qeshm Island	26.9383	56.2784	1	?	?	?	?	?	Juvenile	2007-09-22	2016	First occurrence in Nth Indian Ocean, visual ID corroborated by S. Cerchio
SRIL-01	n/a	Ilangakoon AD 2002 - citing Leatherwood & Reeves 1989; Brownell et al 2017	Incidental Catch	Photographs	Photographic	n/a	n/a	n/a	E	Northwest Indian Ocean / Red Sea	Sri Lanka	Negombo	7.17402	79.8063	3	?	7.5	?	n/a	n/a	?	August of 1985	2017	Examind by Leatherwood and Ilangakoon in 1985; re-evaluated by photographs as omurai by RLB
SRIL-02	n/a	de Vos 2017	Live Sighting	Photographs	Photographic	n/a	n/a	n/a	E	Northwest Indian Ocean / Red Sea	Sri Lanka	Southern coast	5.877	80.48	2	n/a	n/a	n/a	n/a	n/a	n/a	2017-02-05	2017	Visual ID corroborated by S. Cerchio
EGYP-01	n/a	Notarbartolo di Sciara et al. 2017 https://www.youtube.com/watch?v=Y68R-7VsUvU	Live Sighting	Photographs	Photographic	n/a	n/a	n/a	E	Northwest Indian Ocean / Red Sea	Egypt	Safaga, Red Sea	26.8833	34	1	n/a	n/a	n/a	n/a	n/a	n/a	April of 2009	2017	Youtube video from Red Sea dive trip, corroborated by S. Cerchio
MADA-01	n/a	Cerchio et al 2015	Live Sighting	Tissue (Biopsy), photographs	Genetic	KT582064	mt DNA control region	D	F	Southwest Indian Ocean	Madagascar	Nosy Be, Bank of Five meters	-13.3994	48.0854	1	n/a	n/a	n/a	n/a	n/a	n/a	2011 to 2016	2015	Study population off Nosy Be, central hotspot off field station of Bank of 5 meters / Rosario Bank. This single record in database represents 20 individuals samples and sequenced for mtDNA CR, accompanied by 247 sightings from 2011-2016
MADA-02	n/a	Cerchio satellite tag data, Cerchio et al. 2018	Live Sighting	Tissue (Biopsy), photographs	Photographic	n/a	n/a	n/a	F	Southwest Indian Ocean	Madagascar	Nosy Hao	-12.056	49.065	1	n/a	n/a	n/a	n/a	n/a	n/a	2016-12-14	2018	Most northern extent of sat tagged whales, Mamy Tag03
MADA-03	n/a	Cerchio satellite tag data, Cerchio et al. 2018	Live Sighting	Tissue (Biopsy), photographs	Photographic	n/a	n/a	n/a	F	Southwest Indian Ocean	Madagascar	Ampitily	-14.808	47.224	1	n/a	n/a	n/a	n/a	n/a	n/a	2017-01-16	2018	Most southern extent of sat tagged whales, Mamy Tag03
MADA-04	n/a	Nick Filmater, pers. comm.	Live Sighting	Photographs	Photographic	n/a	n/a	n/a	F	Southwest Indian Ocean	Madagascar	Nosy Chesterfield	-16.3254	43.6876	1	n/a	n/a	n/a	n/a	n/a	n/a	2016-07-26	2016	Photo and video by N. Filmater, corroborated by S. Cerchio
MADA-05	n/a	Nick Filmater, pers. comm.	Live Sighting	Photographs	Photographic	n/a	n/a	n/a	F	Southwest Indian Ocean	Madagascar	Ambozaka	-19.3963	43.8918	1	n/a	n/a	n/a	n/a	n/a	n/a	2016-07-18	2016	Photo by N. Filmater, corroborated by S. Cerchio
CHAG-01	n/a	Sousa and Harris 2015	Acoustic - IMS-CTBTO hydrophones	Acoustic	Acoustic	n/a	n/a	n/a	F	Southwest Indian Ocean	Chagos Archipelago	Diego Garcia North	-6.3	71	1	n/a	n/a	n/a	n/a	n/a	n/a	2002-2003	2017	Mada Call Type1b, confirmed by S. Cerchio; present in 2002: Jan,May-Jul,Dec; 2003: Jan-Feb,Jul-Dec
CHAG-02	n/a	Sousa and Harris 2015	Acoustic - IMS-CTBTO hydrophones	Acoustic	Acoustic	n/a	n/a	n/a	F	Southwest Indian Ocean	Chagos Archipelago	Diego Garcia South	-7.6	72.5	1	n/a	n/a	n/a	n/a	n/a	n/a	2002-2003	2017	Mada Call Type1b, confirmed by S. Cerchio; present in 2002: May; 2003: Aug
MAUR-01	MauBs	Jung et al 2015	Stranding	Tissue	Genetic	KM233837; KM233838; KM233839	mtDNA Dloop 798bp; Cytb;Cox1	A	G	Northeast Atlantic Ocean	Mauritania	Diawling National Park	16.5415	-16.4504	1	No	3.98	Unk	?	Unk	Juvenile	2013-11-03	2015	First Atlantic specimen documented
BRAZ-01	#02C0172/421	Cypriana-Souza et al 2016	Stranding	Tissue	Genetic	KX254408; KX254409; KX254410	mtDNA Partial control region 428bp; cytb; cox1	A	H	Southwest Atlantic Ocean	Brazil	Pecem beach, Sao Gonc alo do Amarante, Ceara State	-3.53656	-38.7977	1	?	4.16	F	n/a	Unk	Neonate	2010-09-10	2016
BRAZ-02	n/a	Moreira et al. 2018	Acoustic - COLMEIA hydrophones	Acoustic	Acoustic	n/a	n/a	n/a	H	Southwest Atlantic Ocean	Brazil	Mid-Atlantic Ridge near Sao Pedro & Sao Paulo - C2 hydrophone	1.33	-31.35	1	n/a	n/a	n/a	n/a	n/a	n/a	Feb-Dec 2013	2017	Manuscript in prep for submission
BRAZ-03	n/a	Moreira et al. 2018	Acoustic - COLMEIA hydrophones	Acoustic	Acoustic	n/a	n/a	n/a	H	Southwest Atlantic Ocean	Brazil	Mid-Atlantic Ridge near Sao Pedro & Sao Paulo - C5 hydrophone	0.167	-27.783	1	n/a	n/a	n/a	n/a	n/a	n/a	Feb-Dec 2013	2017	Manuscript in prep for submission

## Sheet: Definitions
Field	Description
Acct#	Account number for this study, Cerchio, Yamada & Brownell 2019
Museum/Ref #	Museum or Reference number of specimen if exists and known
Citation/Source	Self-explanatory
Specimen Source	Self-explanatory
Specimen Type	Self-explanatory
Verification	Form of species verification: Genetic, Skull Morphology, Photographic, Acoustic, Visual Report
GenBank #	Self-explanatory
GenBank Sequence Type	Self-explanatory
Prelim CR Hap	Preliminary mtDNA Control Region Haplotype
Region Label	Alphabetic label for region
Region	Region as defined for this study, Cerchio, Yamada & Brownell 2019
Country	Self-explanatory
Location	Self-explanatory
Lat-dd	Latitude in decimal degrees
Long-dd	Longitude in decimal degrees
Coord Qual	Quality of coordinates: 1 - Precise, as provided in source; 2 - Estimated from map in source; 3 - Approximated from textual description in source
Collected baleen plates	Self-explanatory
Body length (m)	Self-explanatory
Sex	Self-explanatory
Ovaries‡ or testes§	Self-explanatory
Age	Self-explanatory
Physical maturity	Self-explanatory
Date of Account	Self-explanatory
Locale Recognition Year	Year in which account/specimen was recognized as B. omurai, indicated for only first account in a given locale
Comment	Additional relevant information
Inputs	Explanation
n/a	Not applicable to account type
Unk	Not recorded or collected, and therefore unknown
?	Uncertain whether data was collected or if information exists
No	For Baleen Plates and Ovaries/Testes, not collected

## Sheet: References
	Acebes, J.M.V. (2009). Historical whaling in the Philippines: origins of ‘indigenous subsistence whaling’, mapping whaling grounds and comparison with current known distribution: a HMAP Asia Project Paper. History of Marine Animal Populations working paper 161. Murdoch University, Perth. 37 pp.
	Acebes, J.M.V. (2013). Hunting “big fish”: a marine environmental history of a contested fishery in the Bohol Sea. Doctoral dissertation, Perth, Murdoch University. 395 pp.
	Acebes, J.M.V. (2014). “A history of whaling in the Philippines: a glimpse of the past and current distribution of whales,” in: Historical Perspectives of Fisheries Exploitation in the Indo-Pacific, eds. Christensen J., and Tull M., (Dordrecht: Springer), 83-105.
	Adulyanukosol, K., Thongsukdee, S., Passada, S., Prempree, T. and Wannarangsee, T. (2012) Bryde’s Whales in Thailand. Bangkok: Aksornthai Printing Co.
	Anonymous (1955). Hong Kong's whale. Spectrum: The Magazine of the Hong Kong University Science Society 4: 33-41.
	Aragones, L.V., Roque, M.A.A., Flores, M.B., Encomienda, R.P., Laule, G.E., Espinos, B.G., ... and Braun, R.C. (2010). The Philippine marine mammal strandings from 1998 to 2009: animals in the Philippines in peril? Aquatic Mammals, 36, 219.
	Brownell, R.L., Jr., de Vos, A. and Ilangakoon, A. D. (2017). Large whale strandings from Sri Lanka between 1889 and 2014. Paper SC/67A/HIM/11 presented to the International Whaling Commission Scientific Committee. 13 pp.
	Cerchio, S., Andrianantenaina, B., Lindsay, A., Rekdahl, M., Andrianarivelo, N., and Rasoloarijao, T. (2015). Omura’s whales (Balaenoptera omurai) off northwest Madagascar: ecology, behaviour and conservation needs. Royal Society open science, 2, 150301.
	Cerchio, S., Andrianantenaina, B., Zerbini, A., Pendleton, D., Rasoloarijao, T., and Cholewiak, D. (2018). Residency, feeding ecology, local movements and potential isolation of the Madagascar Omura’s whale (Balaenoptera omurai) population. Paper SC/67B/NH/09 presented to the International Whaling Commission Scientific Committee. 25 pp.
	Chien, P.V. and Quan, N.V. (2013). Balaenoptera omurai Wada, Oishi, Yamada, 2003 (Balaenopteridae): A new record for the marine mammals of Vietnam [in Thai]. The 5th National Conference on Ecology and Biological Resources, 2013, pp 39-43.
	Cypriano‐Souza, A.L., Meirelles, A.C.O., Carvalho, V.L., and Bonatto, S.L. (2016). Rare or cryptic? The first report of an Omura's whale (Balaenoptera omurai) in the South Atlantic Ocean. Marine Mammal Science, 33, 80-95.
	Dolar, M.L., Leatherwood, S., Wood, C.J., Alava, M.N., Hill, C.L., and Aragones, L.V. (1994). Directed fisheries for cetaceans in the Philippines. Reports of the International Whaling Commission 44, 439-49.
	de Vos, A. (2017). First record of Omura’s whale, Balaenoptera omurai, in Sri Lankan waters. Marine Biodiversity Records 10, 18.
	Egami, T., and Kojima, K. (2017). Records of whaling and societal change in Lamalera, Indonesia. Presentation at 28th Annual meeting of The Cetology Study Group of Japan, Sapporo, Japan, 24-25 June 2017.
	Garrigue, C. and Poupon, M. (2013). Guide d’identification: Mammifères Marins de Nouvelle-Calédonie [in French]. Nouméa, New Caldeonia: Artypo.
	Goto, M. (2012). Tsunoshimakujirano gaibukeitaito bunpuikino suitei oyobi Bryde’s whale complexni kansuru ichikousatsu (External morphology and estimated distribution range of Omura’s whale and a consideration on the Bryde’s whale complex.) [in Japanese]. Geiken Tsushin 455, 1-9.
	Ilangakoon, A. 2002. Whales and dolphins of Sri Lanka. Colombo: WHT Publications Limited.
	Ishikawa, H., Goto, M. and Mogoe, T. (2013). Stranding Record in Japan 1901-2012 [in Japanese]. Shimonoseki Marine Science Report 1, 11-15.
	Jung, J. L., Mullié, W. C., Van Waerebeek, K., Wagne, M. M., Bilal, A. S. O., Sidaty, Z. A. O., Toomey, L., Méheust, E. and Marret, F. (2015). Omura’s whale off West Africa: autochthonous population or inter-oceanic vagrant in the Atlantic Ocean? Mar. Biol. Res. 12, 66-75.
	Kahn, B. (2001). Komodo National Park Cetacean Surveys: A rapid ecological assessment of cetacean diversity, abundance and distribution. Report to The Nature Conservancy Indonesia Coastal and Marine Program. April 2001.
	Kahn, B. (2005). Indonesia Oceanic Cetacean Program Activity Report: January-February 2005. Report to The Nature Conservancy SE Asia Center for Marine Protected Areas. April 2005.
	Kahn, B., Wawandono, N.B., and Subijanto, J. (2001). Protecting the cetaceans of Komodo National Park, Indonesia: Positive identification of the rare pygmy Bryde’s whale (Balaenoptera edeni) with the assistance of genetic profiling. Status report to The Nature Conservancy.
	Kim, J.H., Kim, H.W., Kim, E.M., and Sohn, H. (2018). First Record of the Omura’s whale (Balaenoptera omurai) in Korean Waters. Anim. Syst. Evol. Divers. 34, 162-167.
	Leatherwood, S., and Reeves, R.R. (editors). (1989). Marine mammal research and conservation in Sri Lanka 1985-1986. United Nations Environment Programme (UNEP), Marine Mammal Technical Report No. 1, Nairobi, Kenya.
	Ma, M., Zhu, Q., Li, X., Sun, Y., Liu, Y.Y., Liu, Y.N., and Tao, C.H. (2007). Identification of Balaenoptera omurai from an unknown whale vertebra based on Cyt b gene sequence [in Chinese]. Acta Theriologica Sinica 27, 288–292.
	McPherson, C.R., Martin, B., MacDonnell, J., Whitt, C. (2016a). Examining the value of the Acoustic Variability Index in the characterisation of Australian marine soundscapes. Proceedings of ACOUSTICS 2016, 9-11 November 2016, Brisbane, Australia. 13pp.
	McPherson, C., K. Kowarski, J. Delarue, C. Whitt, J. MacDonnell and B. Martin. 2016b. Passive Acoustic Monitoring of Ambient Noise and Marine Mammals—Barossa Field: . JASCO Document 00997, Version 1.0. Technical report by JASCO Applied Sciences for Jacobs. Capalaba: JASCO.
	McCauley, R.D. (2009). Sea noise logger deployment Scott Reef, 2006-2008 – whales, fish and seismic surveys. Report prepared for Woodside Energy, CMST R2009-15, 88 pp.
	McCauley, R.D. (2011). Woodside Kimberley Sea Noise Logger Program, September 2006 to June 2009: Whales, fish and man made noise. Report R2010-50_3 prepared for Woodside Energy, Ltd. 80pp.
	McCauley, R. D. (2014). Joseph Bonaparte Gulf Sea Noise Logger Program, Sep-2010 to Sep-2013, Ambient Noise, Great Whales and Fish. Report prepared for RPS MetOcean, CMST R2013-52, 75pp.
	Miyakawa, N. (2018). A record of Omura's whale stranding on Katsuura coast, in July 2017. The 2018 Annual Meeting of the Mammal Society of Japan, Kami-Ina, Nagano, Japan, September 7 -10, 2018.
	Moreira, S. C., Sousa-Lima, R. S., Maia, M., Sukhovich, A., Royer, J. Y., ... and Cerchio, S. (2018). Caracterização das emissões sonoras de Balaenoptera omurai no Oceano Atlântico equatorial: Uma contribuição para melhor avaliação da distribuição da espécie [in Portuguese]. Abstracts XII Congreso de la Sociedad Latinoamericana de Especialistas en Mamíferos Acuáticos - RT 18, 5-8 Noviembre 2018, …
	Notarbartolo di Sciara, G., Kerem, D., Smeenk, C., Rudolph, P., Cesario, A., Costa, M., Elasar, M., Feingold, D., Fumagalli, M., Goffman, O., Hadar, N., Mebrathu, Y.T., and Scheinin, A. (2017). Cetaceans of the Red Sea. CMS Technical Series 33, 86 pp.
	Oishi, M., Wada, S., Yamada, T.K. (2004). Outline of the research on Tsunoshima-kujira, Balaenoptera omurai, with the comments on the classification of so-called Bryde's whales, B. edeni and B. brydei [in Japanese]. Nihonkai Cetology 14:1-12.
	Oremus, M., Leqata, J., Hurutarau, J., Taei, S., Donoghue, M., Thompson, K., and Baker, C.S. (2011). Solomon Islands Dolphin Project: Progress report on data collection and analyses. Technical report to the South Pacific Whale research Consortium. 27 pp.
	Ottewell, K., Coughran, D., Gall, M., Irvine, L. and Byrne, M. (2016). Stranding of Omura’s Whale (Balaenoptera omurai) in Western Australia. Aquat. Mamm. 42, 193-197. DOI 10.1578/AM.42.2.2016.193
	Perrin, W. F., Dolar, M. L. L. and Ortega, E. 1996. Osteological comparison of Bryde’s whales from the Philippines with specimens from other regions. Paper SC/47/NP2 presented to the International Whaling Commission Scientific Committee.
	Ponnampalam, L.S. (2012). Opportunistic observations on the distribution of cetaceans in the Malaysian South China, Sulu and Sulawesi Seas and an updated checklist of marine mammals in Malaysia. Raffles B. Zool. 60, 221–231.
	Ranjbar, S. Dakhteh, S.M.H., Van Waerebeek, K. (2016). Omura's whale Balaenoptera omurai stranding on Qeshm Island, Iran, Persian Gulf: further evidence for a wide (sub)tropical distribution. J. Mar. Biol. Oceanogr. 5: 3. DOI: 10.4172/2324-8661.1000161
	Rosel, P.E., and Wilcox, L.A. (2014). Genetic evidence reveals a unique lineage of Bryde’s whales in the northern Gulf of Mexico. Endangered Species Research, 25, 19-34.
	Sasaki, T., Nikaido, M., Wada, S., Yamada, T. K., Cao, Y., Hasegawa, M. and Okada, N. (2006). Balaenoptera omurai is a newly discovered baleen whale that represents an ancient evolutionary lineage. Mol. Phylogenet. Evol. 41, 40–52. DOI:10.1016/ j.ympev.2006.03.032
	Sousa, A.G. and Harris, D. (2015). Description and seasonal detection of two potential whale calls recorded in the Indian Ocean. The Journal of the Acoustical Society of America, 138, 1379-1388.
	Van Canneyt, O., Dorémus, G., Laran, S., Ridoux, V. and Watremez, P. (2015). REMMOA Nouvelle-Calédonie Wallis et Futuna: Rapport de campagne. Rapp. intermédiaire pour l’Agence des Aires Mar. Protégées [in French]. 65pp.
	Wada, S., and Numachi, K. (1991). Allozyme analyses of genetic differentiation among the populations and species of the Balaenoptera. Reports Int. Whal. Comm. Spec. Issue 13, 125–1545.
	Wada, S., Oishi, M. and Yamada, T. K. (2003). A newly discovered species of living baleen whale. Nature 426, 278–281.
	Wang, P. (2012). Chinese cetaceans (2nd ed.) [in Chinese]. Beijing: Chemical Industry Press.
	Wang, H., Fan, Z., Shen, H., and Peng, Y. 2006. Description of new record species of whales from Chinese coastal waters [in Chinese]. Fisheries Science, 25(2), 85-87. DOI:10.3969/j.issn.1003-1111.2006.02.010
	Weber, M.W.C. (1923). Die Cetaceen der Siboga-Expedition [in German]. Vorkommen und Fang der Cetaceen im Indo-Australischen Archipel. Siboga Exped., Monogr. LVIII (Livr. 97): [i-v], 1-38, pis. l-III, [1-3].
	Xu, M., Wang, X., Miao, X., Wu, F., Ma, M., Tao, C., and Zhu, Q. (2017). A stranding of Omura’s whale (Balaenoptera omurai Wada, Oishi and Yamada, 2003) in the Taiwan Strait, China. Aquatic Mammals 43, 289-298. DOI:10.1578/AM.43.3.2017.289
	Yamada, T.K. (2009). “Omura’s whale, Balaenoptera omurai”, in The Wild Mammals of Japan, eds. S. Ohdachi, Y. Ishibashi, M. Iwasa, and T. Saitoh (Kyoto: Shoukahoh Book Sellers and Mammalogical Society of Japan), 330–331.
	Yamada, T.K., Chou, L.S., Chantrapornsyl, S., Adulyanukosol, K., Chakravarti, S.K., Oishi, M., Wada, S., Yao, C.J., Kakuda, T., Tajima, Y. and Arai, K. (2006a). Middle-sized balaenopterid whale specimens (Cetacea: Balaenopteridae) preserved at several institutions in Taiwan, Thailand, and India. Mem. Natl. Sci. Museum, Tokyo 44, 1–10.
	Yamada, T. K., Kemper, C., Tajima, Y., Umetani, A., Janetzki, H. and Pemberton, D. (2006b). Marine Mammal Collections in Australia. Natl. Sci. Museum Monogr. 34, 117–126.
	Yamada, T. K., Kakuda, T. and Tajima, Y. (2008). Middle sized balaenopterid whale specimens in the Philippines and Indonesia. Mem. Natl. Sci. Museum, Tokyo 45, 75–83.
	Yang, G., Liu, H., Zhou, K. and Ji, G. (2002). Identification of a Balaenoptera edeni specimen by using mitochondrial DNA sequences [in Chinese]. Chinese J. Zool. 37, 35–38.
	Yoshida, H., and Kato, H. (1999). Phylogenetic relationships of Bryde’s whale in the western North Pacific and adjacent waters inferred from mitochondrial DNA sequences. Mar. Mammal Sci. 15, 1269–1286.
